# Supplementary material for: Novel models for prediction of benefit and toxicity with FOLFIRINOX treatment of pancreatic cancer using clinically available parameters
Source: PLoS One. 2018 Nov 9;13(11):e0206688. doi: 10.1371/journal.pone.0206688 (PMC6226156; doi:10.1371/journal.pone.0206688)
Supplement: S1 Data — (XLSX) [file pone.0206688.s002.xlsx]

## Sheet: FOLFIRINOX_in Arbeit
ID	anytox	1Dosierung	os(mo)	pfs(mo)	progress	Gender_m_f	surgic_0no_1yes	primärkurativja_1	ctx_0istkeine_1istNeo_2istadj_3istpall	FirstlinepallFOFLIRINOXja_1	prioradjCTX_ja1	secondlineja_1	Firstline_FOLFIRINOX1_GemzarDouble2_GemzarMono3_keine Chemo0	2nd line ja/nein	kg2ndline	Protokoll 2nd line	Secondline_FOLFIRINOX1_GemzarDouble2_GemzarMono3_weniger4_keine Chemo0	3rd line	1.Gabe	Dosierung	Mean Dosierung1.Gabe	2.Gabe	Dosierung	Mean Dosierung2.Gabe	1GZ	2GZ	Intervall ½	3.Gabe	Dosierung	Mean Dosierung3.Gabe	2GZ	3GZ	Intervall 2/3	4.Gabe	Dosierung	Mean Dosierung4.Gabe	4GZ	5GZ	Intervall ¾	5.Gabe	Dosierung	Mean Dosierung5.Gabe	5GZ	6GZ	Intervall 4/5	6.Gabe	Dosierung	Mean Dosierung6.Gabe	6GZ
P1	0	1	8.83	0.33	1	m	0	0	3	1			1	nein	123456		123456		2013-02-25	1	1			0	41330	0	#NUM!			0	0	0	0			0	0	0	0			0	0	0	0			0	0
P2	1	1	9.9	7.4	1	f	0	0	3	1			1	ja	68	Gemcitabin + Abraxane	2		2013-10-02	1	1	2013-10-25	1	1	41549	41572	23	2013-11-08	1	1	41572	41586	14	2013-11-22	1	1	41600	41624	14	2013-12-16	1	1	41624	41670	24	2014-01-31	1	1	41670
P3	0	1	8.97	4.03	1	f	0	0	3	1			1	ja	70	Gemcitabin	3		2011-01-31	1	1	2011-02-14	1	1	40574	40588	14	2011-03-08	1	1	40588	40610	22	2011-03-22	1	1	40624	40638	14	2011-04-05	1	1	40638	40652	14	2011-04-19	1	1	40652
P4	1	1	3.6	3.63	1	m	0	0	3	1			1	nein	123456		0		2013-08-14	1	1	2013-08-29	0.75	0.75	41500	41515	15	2013-09-13	1	1	41515	41530	15	2013-10-02	0.8	0.8	41549	41564	19	2013-10-17	0.8	0.8	41564	42678	15	2016-11-04	0.8	0.8	42678
P5	1	1	17.4	1.43	1	m	0	0	3	1			1	ja	69	Gemcitabin + Tarceva	2		2012-08-28	1	1	2012-09-10	1	1	41149	41162	13	2012-09-25	1	1	41162	41177	15			0	0	0	#NUM!			0	0	0	0			0	0
P6	0	0.8	6	4.5	1	m	0	0	3	1			1	nein	123456				2015-01-17	0.8	0.8	2015-02-10	0.8	0.8	42021	42045	24	2015-02-24	0.8	0.8	42045	42059	14	2015-03-12	0.8	0.8	42075	42089	16	2015-03-26	0.8	0.8	42089	42103	14	2015-04-09	0.8	0.8	42103
P7	0	1	5.4	4.57	1	m	0	0	3	1			1	ja	82	gem-nab			2013-06-10	1	1	2013-06-25	1	1	41435	41450	15	2013-07-09	1	1	41450	41464	14	2013-07-23	1	1	41478	41492	14	2013-08-06	1	1	41492	41506	14	2013-08-20	1	1	41506
P8	0	1	4.7	4.7	0	f	0	0	3	1			1	nein	123456				2016-05-27	1	1	2016-06-09	1	1	42517	42530	13	2016-06-24	1	1	42530	42545	15	2016-07-08	1	1	42559	0	14			0	0	0	#NUM!			0	0
P9	0	0.75	1.23	1.23	1	f	0	0	3	1			1	nein	123456		0		2013-04-19	0.75	0.75			0	41383	0	#NUM!			0	0	0	0			0	0	0	0			0	0	0	0			0	0
P10	1	0.7	12.5	12.5	1	m	1	1	2	0	1	1	3	ja		FOLFIRINOX	1		2012-03-05	0.7	0.7	2012-03-22	0.7	0.7	40973	40990	17	2012-04-12	0.7	0.7	40990	41011	21	2012-05-04	0.7	0.7	41033	41058	22	2012-05-29	0.7	0.7	41058	41085	25	2012-06-25	0.7	0.7	41085
P11	0	1	9.7	3.9	1	m	0	0	3	1			3	ja	79	gem-nab			2014-11-04	1	1	2014-11-18	1	1	41947	41961	14	2014-12-02	1	1	41961	41975	14	2014-12-16	1	1	41989	41644	14	2014-01-05	1	1	41644	41658	#NUM!	2014-01-19	1	1	41658
P12	1	1	5.7	5.7	1	m	1	1	2	0	1	1	3	ja	123456	FOLFIRINOX	1		2012-09-05	1	1	keine CTX auf Pat		0	41157	keine CTX auf Pat	#VALUE!			0	keine CTX auf Pat	0	#VALUE!			0	0	0	0			0	0	0	0			0	0
P13	1	1	24.1	2.23	1	m	0	0	3	1			1	ja		Gemcitabin + Abraxane	2		2013-09-25	1	1	2013-10-10	1	1	41542	41557	15	2013-10-24	0.85	0.85	41557	41571	14	2013-11-07	0.85	0.85	41585	41599	14	2013-11-21	0.85	0.85	41599	41613	14	2013-12-05	0.85	0.85	41613
P14	1	1	5.3	5.3	0	m		1	1	0	0	0	1	nein	123456				2016-05-09	1	1	2016-05-27	1	1	42499	42517	18	2016-06-10	1	1	42517	42531	14	2016-06-28	1	1	42549	42563	18	2016-07-12	1	1	42563	0	14			0	0
P15	0	1	7.57	2.83	1	f	1	1	2	0	1	1	3	ja		FOLFIRINOX	1	NEU: Taxol	2011-03-08	1	1	2011-03-22	0.75	0.75	40610	40624	14	2011-04-06	1	1	40624	40639	15	2011-04-18	1	1	40651	40668	12	2011-05-05	1	1	40668	40679	17	2011-05-16	1	1	40679
P16	0	0.9	12.9	10.63	1	m	0	0	3	1			1	ja		Gemcitabin + Abraxane	2		2013-05-17	0.9	0.9	2013-06-03	0.9	0.9	41411	41428	17	2013-06-17	0.9	0.9	41428	41442	14	2013-07-01	0.9	0.9	41456	41478	14	2013-07-23	0.8	0.8	41478	41505	22	2013-08-19	0.8	0.8	41505
P17	1	0.75	8.5	6.47	1	f	0	0	3	1			1	ja		Paclitaxel	4		2012-01-03	0.75	0.75	2012-01-16	0.75	0.75	40911	40924	13	2012-02-06	0.75	0.75	40924	40945	21	2012-02-21	0.75	0.75	40960	40974	15	2012-03-06	0.75	0.75	40974	40988	14	2012-03-20	0.75	0.75	40988
P18	0	1	9.8	1.43	1	m	1	0	3	1			1	ja		gem/tarceva	0	Nab	2012-03-13	1	1	2012-03-28	1	1	40981	40996	15	2012-04-11	1	1	40996	41010	14			0	0	0	#NUM!			0	0	0	0			0	0
P19	1	0.9	19.7	7.53	1	m	0	0	3	1			1	ja		Gemcitabin	3	doce	2011-02-17	0.9	0.9	2011-03-04	0.9	0.9	40591	40606	15	2011-03-18	0.8	0.8	40606	40620	14	2011-04-08	80% (FU 60%)	0.73	40641	40655	21	2011-04-22	80% (FU 60%)	0.73	40655	40675	14	2011-05-12	80% (FU 60%)	0.73	40675
P20	0	1	13.67	6.97	1	m	1	0	3	1			1	ja		gem/nab		myocet	2014-11-04	1	1	2014-11-18	1	1	41947	41961	14	2014-12-02	1	1	41961	41975	14	2014-12-16	1	1	41989	42002	14	2014-12-29	1	1	42002	41652	13	2014-01-13	1	1	41652
P21	0	75% (Cpt-11:50%	1.33	1.33	1	m	0	0	3	1			1	nein	123456		0		2013-02-01	75% (Cpt-11:50%	0.67			0	41306	0	#NUM!			0	0	0	0			0	0	0	0			0	0	0	0			0	0
P22	1	1	4.47	4.47	1	m	0	0	3	1			1	nein	123456	nein			2015-03-30	1	1	2015-04-20	1	1	42093	42114	21	2015-05-11	1	1	42114	42135	21			0	0	0	#NUM!			0	0	0	0			0	0
P23	1	1	9.67	5.53	1	f	0	0	3	1			1	ja		gem-nab		nein	2015-06-18	1	1	2015-07-02	1	1	42173	42187	14	2015-07-21	1	1	42187	42206	19	2015-08-04	1	1	42220	42237	14	2015-08-21	1	1	42237	42254	17	2015-09-07	1	1	42254
P24	1	1	22.23	8.57	1	f	0	0	3	1			1	ja		gem-nab		massitinib	2014-12-18	1	1	2014-01-09	1	1	41991	41648	#NUM!	2014-01-23	1	1	41648	41662	14	2014-02-06	1	1	41676	41690	14	2014-02-20	1	1	41690	41753	14	2014-04-24	0.75	0.75	41753
P25	1	0.75	21.93	15.23	1	f	0	0	3	1			1	ja		Gemcitabin + Abraxane	2		2013-10-01	0.75	0.75	2013-10-15	0.75	0.75	41548	41562	14	2013-10-30	0.75	0.75	41562	41577	15	2013-11-12	0.75	0.75	41590	41605	13	2013-11-27	0.75	0.75	41605	41619	15	2013-12-11	0.75	0.75	41619
P26	0	1	7.6	3.2	1	m	0	0	3	1			1	ja		gem-nab		myocet	2014-05-07	1	1	2014-05-22	1	1	41766	41781	15	2014-06-13	1	1	41781	41803	22	2014-06-27	1	1	41817	41830	14	2014-07-10	1	1	41830	41848	13	2014-07-28	1	1	41848
P27	1	1	22	19.47	1	f	1	0	3	1			1	ja		Gemcitabin + Abraxane	2	myocet	2013-05-27	1	1	2013-06-13	1	1	41421	41438	17	2013-06-27	1	1	41438	41452	14	2013-07-18	1	1	41473	41494	21	2013-08-08	0.75	0.75	41494	41509	21	2013-08-23	0.75	0.75	41509
P28	0	1	6.87	2.93	1	m	1	1	2	0	1	1	3	ja		Folfirinox		RTX/ Gem-nab	2014-11-19	1	1	2014-12-04	1	1	41962	41977	15	2014-01-19	1	1	41977	41658	#NUM!	2014-01-23	1	1	41662	41676	4	2014-02-06	1	1	41676	0	14			0	0
P29	1	0.85	46.23	12.77	1	m	0	0	3	1			1	ja		nein	2		2012-12-28	0.85	0.85	2012-01-17	0.85	0.85	41271	40925	#NUM!	2012-02-01	0.85	0.85	40925	40940	15	2012-02-15	0.85	0.85	40954	40974	14	2012-03-06	0.85	0.85	40974	40988	20	2012-03-20	0.85	0.85	40988
P30	0	0.75	4.57	1.07	1	m	0	0	3	1			1	ja		Gemcitabin	3		2011-02-11	0.75	0.75	2011-02-28	0.75	0.75	40585	40602	17	2011-03-15	0.75	0.75	40602	40617	15	2011-03-30	0.75	0.75	40632	0	15			0	0	0	#NUM!			0	0
P31	1	1	14.87	7.27	1	m	1	1	2	0	1	1	3	ja		folfirinox			2015-04-27	1	1	2015-08-07	1	1	42121	42223	102	2015-08-28	0.8	0.8	42223	42244	21	2015-09-11	0.8	0.8	42258	42279	14	2015-10-02	0.8	0.8	42279	42300	21	2015-10-23	0.8	0.8	42300
P32	1	1	5.2	5.2	0	f	1	0	3	1			1		123456	not jet			2016-05-12	1	1	2016-05-25	0.8	0.8	42502	42515	13			0	42515	0	#NUM!			0	0	0	0			0	0	0	0			0	0
P33	1	0.75	14.23	12.4	1	m	0	0	3	1			1	ja		Gemcitabin	3	nein	2016-08-10	0.75	0.75	2016-08-24	1	1	42592	42606	14	2016-09-07	1	1	42606	42620	14	2016-09-21	1	1	42634	42656	14	2016-10-13		0	42656	42670	22	2016-10-27		0	42670
P34	0	0.85	1.77	1.77	1	f	0	0	3	1			1		123456	nein		nein	2012-10-18	0.85	0.85	Tod		0	41200	Tod	#VALUE!			0	Tod	0	#VALUE!			0	0	0	0			0	0	0	0			0	0
P35	1	1	2.87	2.87	1	m	0	0	3	1			1		123456	nein		nein	2015-01-13	1	1	2015-02-16	1	1	42017	42051	34	lost		0	42051	lost	#VALUE!			0	0	0	#VALUE!			0	0	0	0			0	0
P36	1	1	7.73	5.13	1	f	0	0	3	1			1	nein	123456	nein		nein	2013-11-12	1	1	2013-11-29	0.8	0.8	41590	41607	17	2013-12-13	campto 75, oxali 85 und fu50	0.7	41607	41621	14	2013-01-14	campti 70,oxali85, fu50	0.68	41288	41331	#NUM!	2013-02-26	campto/fu50,oxali85	0.62	41331	0	43			0	0
P37	1	100%, irino 75%	54.8	54.8	1	f	1(sek)	0	3	1			1	ja		gem-nab		ja	2011-06-14	100%, irino 75%	0.92	2011-06-30	100%, irino 75%	0.92	40708	40724	16	2011-07-13	100%, irino 75%	0.92	40724	40737	13	2011-07-27	100%, irino 75%	0.92	40751	40763	14	2011-08-08	100%, irino 75%	0.92	40763	40778	12	2011-08-23	100%, irino 75%	0.92	40778
P38	0	1	11.37	6.7	1	f	0	0	3	1			1	ja		Gemcitabin	3	nein	2016-06-28	1	1	2016-07-15	1	1	42549	42566	17	2016-07-29	1	1	42566	42580	14	2016-08-16	1	1	42598	42612	18	2016-08-30	1	1	42612	42626	14	2016-09-13	1	1	42626
P39	1	1	16.67	9.53	1	f	0	0	3	1			1	ja		gem-nab			2015-06-03	1	1	2015-06-22	1	1	42158	42177	19	2015-07-06	1	1	42177	42191	14	2015-07-27	1	1	42212	42226	21	2015-08-10	1	1	42226	42247	14	2015-08-31	1	1	42247
P40	1	1	13.6	13.6	1	m	0	0	3	1			1	ja		gem-nab		nein	2014-11-26	1	1			0	41969	0	#NUM!			0	0	0	0			0	0	0	0			0	0	0	0			0	0
P41	1	1	4.57	4.57	1	f	0	0	3	1			1	nein	123456	nein	0	nein	2013-11-12	1	1	2013-12-06	1	1	41590	41614	24	2013-12-20	1	1	41614	41628	14			0	0	0	#NUM!			0	0	0	0			0	0
P42	1	0.6	17.3	11.43	1	m	0	0	3	1			1	ja		Gemcitabin + Abraxane	2		2014-05-27	0.6	0.6	2014-06-13	1	1	41786	41803	17	2014-06-27	0.7	0.7	41803	41817	14	2013-07-17	1	1	41472	42216	#NUM!	2015-07-31	1	1	42216	42230	744	2015-08-14	1	1	42230
P43	0	0.85	17.67	9.07	1	f	1	1	2	0	1	1	3	ja		Folfironox		taxotere	2011-04-04	0.85	0.85	2011-04-20	0.85	0.85	40637	40653	16	2011-05-06	0.85	0.85	40653	40669	16	2011-05-19	0.85	0.85	40682	40713	13	2011-06-19	0.85	0.85	40713	40724	31	2011-06-30	0.85	0.85	40724
P44	0	1	16.23	11.43	1	f	0	0	3	1			1	ja		Paclitaxel	4	nein	2012-02-24	1	1	2012-03-19	80%; IRI:100%	0.93	40963	40987	24	2012-04-02	80%; IRI:100%	0.93	40987	41001	14	2012-04-19	80%; IRI:100%	0.87	41018	41033	17	2012-05-04	80%; IRI:100%	0.87	41033	41047	15	2012-05-18	80%; IRI:100%	0.87	41047
P45	1	1	3	3	1	m	0	0	3	1			1	nein	123456	nein	nein	nein	2013-02-05	1	1			0	41310	0	#NUM!			0	0	0	0			0	0	0	0			0	0	0	0			0	0
P46	1	1	12.5	7.83	1	m	0	0	3	1			1	ja		gem-nab	1	myocet	2013-04-10	1	1	2013-04-26	1	1	41374	41390	16	2013-05-10	1	1	41390	41404	14	2013-05-24	1	1	41418	41432	14	2013-06-07	1	1	41432	41446	14	2013-06-21	1	1	41446
P47	1	0.85	15.03	15.03	1	m		0	3	1			1	na	123456	na	na	na	2014-10-01	0.85	0.85	2014-10-14	0.85	0.85	41913	41926	13	2014-10-28	0.85	0.85	41926	41940	14	2014-11-11	1	1	41954	41968	14	2014-11-25	1	1	41968	41982	14	2014-12-09	1	1	41982
P48	1	0.75	27.97	20.37	1	m	0	0	3	1			1	ja		Gemcitabin	3	massitinib	2013-02-28	0.75	0.75	2013-03-13	0.75	0.75	41333	41346	13	2013-03-27	0.75	0.75	41346	41360	14	2013-04-24	0.75	0.75	41388	41402	28	2013-05-08	0.75	0.75	41402	41417	14	2013-05-23	0.55	0.55	41417
P49	1	1	29.87	3.53	1	f	0	0	3	1			1	ja		Gemcitabin + Abraxane	2	nein	2013-12-16	1	1	2013-01-10	1	1	41624	41284	#NUM!	2013-01-24	1	1	41284	41298	14	2013-02-10	1	1	41315	41329	17	2013-02-24	1	1	41329	41360	14	2013-03-27	1	1	41360
P50	0	1	24.2	18.53	1	f	0	0	3	1			1	nein	123456	n.v		nein	2012-10-22	1	1	2012-11-07	1	1	41204	41220	16	2012-11-27	1	1	41220	41240	20	2012-12-14	1	1	41257	40912	17	2012-01-04	1	1	40912	40926	#NUM!	2012-01-18	1	1	40926
P51	0	1	4.67	1.6	1	m	1	1	2	0	1	1	3	ja	123456	folfirinox		nein	2016-06-14	1	1	2016-06-28	1	1	42535	42549	14	2016-07-12	1	1	42549	42563	14	2016-07-27	1	1	42578	0	15			0	0	0	#NUM!			0	0
P52	1	1	8.77	1.97	1	f	0	0	3	1			1	ja		Gemcitabin + Abraxane	2	nein	2013-01-15	1	1	2013-01-30	100% campto,Fu 75%	0.83	41289	41304	15	2013-02-27	0.75	0.75	41304	41332	28	2013-03-14	0.75	0.75	41347	0	15			0	0	0	#NUM!			0	0
P53	0	0.5	0.47	0.47	1	f	0	0	3	1			1	nein	123456	nein	0	nein	2012-06-29	0.5	0.5	tod		0	41089	tod	#VALUE!			0	tod	0	#VALUE!			0	0	0	0			0	0	0	0			0	0
P54	1	0.75	5.47	3.27	1	f	1	1	2	0	1	1	3	ja		FOLFIRINOX	1	taxotere	2011-03-15	0.75	0.75	2011-04-18	75%, Fu:0%	0.5	40617	40651	34	2011-05-10	75%, Fu:0%	0.5	40651	40673	22	2011-05-30	75%, Fu:0%	0.5	40693	40708	20	2011-06-14	75%, Fu:0%	0.5	40708	40722	15	2011-06-28	75%, Fu:0%	0.5	40722
P55	1	1	11	11	1	f	1	1	2	0	1	1	3	ja	123456	FOLFIRINOX	1	nein	2012-01-09	1	1	2012-01-23	0.5	0.5	40917	40931	14	2012-02-07	0.5	0.5	40931	40946	15	2012-02-20	0.5	0.5	40959	40973	13	2012-03-05	0.5	0.5	40973	40990	14	2012-03-22	0.5	0.5	40990
P56	0	1	20.77	9.93	1	m	0	0	3	1			1	ja		Gemcitabin + Abraxane	2	doce	2013-02-20	1	1	2013-03-08	1	1	41325	41341	16	2013-03-22	1	1	41341	41355	14	2013-04-05	1	1	41369	41383	14	2013-04-19	1	1	41383	41397	14	2013-05-03	1	1	41397
P57	0	0.75	0.33	0.33	1	m	0	0	3	1			1	nein	123456	nein		nein	2014-08-20	0.75	0.75	tod		0	41871	tod	#VALUE!			0	tod	0	#VALUE!			0	0	0	0			0	0	0	0			0	0
P58	1	1	5.13	2.33	1	m	0	0	3	1			1	ja		GEMOX	2	doce	2011-04-29	1	1			0	40662	0	#NUM!			0	0	0	0			0	0	0	0			0	0	0	0			0	0
P59	1	0.75	16.37	16.37	1	f	1	1	1	1			1	nein	123456		0	nein	2012-08-21	0.75	0.75	2012-09-05	0.75	0.75	41142	41157	15	2012-10-09	0.75	0.75	41157	41191	34	2012-10-23	0.75	0.75	41205	41219	14	2012-11-06	0.75	0.75	41219	41233	14	2012-11-20	0.75	0.75	41233
P60	1	0.75	6.53	2.3	1	m	1	1	2	0	1	1	3	ja		FOLFIRINOX	1	gem-nab	2014-07-08	0.75	0.75	2014-07-22	0.75	0.75	41828	41842	14	2014-08-05	0.75	0.75	41842	41856	14	2014-08-19	0.75	0.75	41870	41904	14	2014-09-22	0.75	0.75	41904	0	34			0	0
P61	0	1	38.77	24.17	1	f	0	0	3	1			1	ja		gem-nab		myocet	2012-11-16	1	1	2012-12-04	1	1	41229	41247	18	2012-12-19	1	1	41247	41262	15	2012-01-09	1	1	40917	40931	#NUM!	2012-01-23	1	1	40931	40945	14	2012-02-06	1	1	40945
P62	1	1	8.63	5.97	1	f	0	0	3	1			1	not yet				not yet	2015-08-03	1	1	2015-08-26	100% iri 0%	0.67	42219	42242	23	2015-09-09	100% iri 0%	0.67	42242	42256	14	2015-09-23	100% iri 0%	0.67	42270	42291	14	2015-10-14	100% iri 0%	0.67	42291	42306	21	2015-10-29	100%Iri0% oxali85%	0.62	42306
P63	1	1	14.63	14.63	0	m	0	0	3	1			1	ja	123456	Gemcitabin + Abraxane	2	erlot	2013-02-22	1	1	2013-03-08	1	1	41327	41341	14	2013-04-03	0.85	0.85	41341	41367	26	2013-04-17	0.85	0.85	41381	41393	14	2013-04-29	0.85	0.85	41393	41407	12	2013-05-13	0.85	0.85	41407
P64	1	1	14.6	6.83	1	m	0	0	3	1			1	not yet				not yet	2016-01-22	1	1	2016-02-15	1	1	42391	42415	24	2016-02-29	1	1	42415	42429	14	2016-03-14	1	1	42443	42464	14	2016-04-04	0.9	0.9	42464	42478	21	2016-04-18	0.9	0.9	42478
P65	1	1	8.9	8.9	0	m	0	0	3	1			1	ja	123456	GEMOX	2	taxotere	2010-08-13	0.8	0.8	2010-08-27	0.8	0.8	40403	40417	14	2010-09-10	0.8	0.8	40417	40431	14	2010-09-24	0.8	0.8	40445	40459	14	2010-10-08	0.8	0.8	40459	40476	14	2010-10-25	0.8	0.8	40476
P66	0	0.8	12.93	4.13	1	m	0	0	3	1			1	ja		Gemcitabin + Abraxane	2	nein	2013-04-25	1	1	2013-05-21	1	1	41389	41415	26	2013-06-08	1	1	41415	41433	18			0	0	0	#NUM!			0	0	0	0			0	0
P67	0	1	8.6	1.7	1	f	0	0	3	1			1	not yet				not yet	2016-04-20	100% Irino50%	0.83	2016-05-06	100% Irino50%	0.83	42480	42496	16	2016-05-19	1	1	42496	42509	13	2016-06-03	1	1	42524	42538	15	2016-06-17	1	1	42538	42552	14	2016-07-01	1	1	42552
P68	1	100% Irino50%	5.93	5.93	0	m	0	0	3	1			1	ja	123456	gem-nab		myocet	2016-04-01	0.9	0.9	2016-04-14	0.9	0.9	42461	42474	13	2016-04-28	0.9	0.9	42474	42488	14	2016-05-17	0.9	0.9	42507	0	19			0	0	0	#NUM!			0	0
P69	0	0.9	4.97	6.57	1	f	0	0	3	1			1	na		na		na	2014-11-11	1	1	2014-12-05	1	1	41954	41978	24	2014-01-05	1	1	41978	41644	#NUM!	2014-01-22	0.85	0.85	41661	0	17			0	0	0	#NUM!			0	0
P70	0	1	2.67	2.1	1	m	1	1	2	0	1	1	3	ja	123456	folfirinox		na	2014-11-28	0.9	0.9	2016-12-12	1	1	41971	42716	745	2016-12-30	1	1	42716	42734	18	2016-04-13	1	1	42473	42396	#NUM!	2016-01-27	1	1	42396	42419	#NUM!	2016-02-19	1	1	42419
P71	1	0.9	14.63	11.27	1	f	1	1	2	0	1	1	3	ja		FOLFIRINOX	1	tax	2011-10-05	1	1	2011-10-27	1	1	40821	40843	22	2011-11-14	1	1	40843	40861	18	2011-11-30	1	1	40877	40890	16	2011-12-13	0.75	0.75	40890	40554	13	2011-01-11	0.75	0.75	40554
P72	0	1	17.13	6.77	1	f	0	0	3	1			1	ja		Gemcitabin	3	nein	2010-11-25	1	1	2010-12-10	1	1	40507	40522	15	2010-01-21	1	1	40522	40199	#NUM!	2010-02-01	1	1	40210	40224	11	2010-02-15	1	1	40224	40246	14	2010-03-09	1	1	40246
P73	0	1	13.63	9.33	1	f	1	0	3	1			1	ja		Gemcitabin	3	nein	2011-09-22	1	1	2011-10-25	0.75	0.75	40808	40841	33			0	40841	0	#NUM!			0	0	0	0			0	0	0	0			0	0
P74	1	1	2.6	1.8	1	m	1	1	2	0	1	1	3	ja		FOLFIRINOX	1	nein	2012-05-21	0.5	0.5	2012-06-08	0.5	0.5	41050	41068	18	2012-06-26	0.75	0.75	41068	41086	18	2012-07-18	0.75	0.75	41108	41129	22	2012-08-08	0.85	0.85	41129	0	21			0	0
P75	0	0.5	4.83	2.87	1	m	0	0	3	1			1	ja	123456	Taxotere	4	nein	2012-02-17	1	1	2012-03-02	1	1	40956	40970	14	2012-03-20	1	1	40970	40988	18	2012-04-10	0.9	0.9	41009	41025	21	2012-04-26	0.9	0.9	41025	41039	16	2012-05-10	0.9	0.9	41039
P76	0	1	10.37	7.6	1	m	0	0	3	1			1	123456		nein	123456	nein	2011-11-25	1	1	2011-12-09	1	1	40872	40886	14			0	40886	0	#NUM!			0	0	0	0			0	0	0	0			0	0
P77	0	1	10.67	10.67	1	f	1	1	1	0	0	0	1	ja	123456	Gemcitabin	3	folfirinox	2014-04-30	1	1	2014-05-14	1	1	41759	41773	14	2014-05-28	1	1	41773	41787	14	2014-06-13	1	1	41803	41816	16	2014-06-26	100% Oxali60	0.87	41816	41830	13	2014-07-10	100% Oxali60	0.87	41830
P78	1	1	29.97	52.27	1	m	1	0	3	1			1	ja		gem-nab		nein	2014-08-27	fu80%iri60, oxali77%	0.72	2014-09-10	fu80%iri60, oxali77%	0.72	41878	41892	14	2014-10-02	iri60, oxali77%	0.79	41892	41914	22	2014-10-16	iri60, oxali77%	0.79	41928	0	14			0	0	0	#NUM!			0	0
P79	1	fu80%iri60, oxali77%	11.8	2.67	1	f	1	1	2	0	1	1	3	ja		FOLFIRINOX	1	Tarceva	2011-10-07	1	1	2011-10-21	1	1	40823	40837	14	2011-11-04	1	1	40837	40851	14	2011-11-30	1	1	40877	40893	26	2011-12-16	1	1	40893	40546	16	2011-01-03	1	1	40546
P80	0	1	13.8	5.33	1	f	0	0	3	1			1	ja		Gemcitabin + Abraxane	2	nein	2014-05-08	0.85	0.85	2014-05-26	0.85	0.85	41767	41785	18	2014-06-17	0.85	0.85	41785	41807	22	2014-07-02	0.85	0.85	41822	41838	15	2014-07-18	0.85	0.85	41838	41863	16	2014-08-12	0.85	0.85	41863
P81	1	0.85	5.47	3.77	1	m	1	1	2	0	1	1	3	ja		folfiriniox		gem-nab	2016-01-08	100% Fu80%	0.93	2016-01-22	100% Fu80%	0.93	42377	42391	14	2016-02-09	100% Fu80%	0.93	42391	42409	18	2016-02-23	100% Fu80%	0.93	42423	42437	14	2016-03-08	100% Fu80%,Oxa80%	0.87	42437	42459	14	2016-03-30	Fu80%,Oxa80%	0.87	42459
P82	1	100% Fu80%	9.37	3.27	1																0			0	0	0	0			0	0	0	0			0	0	0	0			0	0	0	0			0	0
P83	1	1	5.17	2.8	1	m	0	0	3	1			1	ja		GEMOX	2	nein	2011-05-04	1	1	2011-06-07	1	1	40667	40701	34	2011-07-11	1	1	40701	40735	34			0	0	0	#NUM!			0	0	0	0			0	0
P84	0	0.6	6.2	1.17	1	m	0	0	3	1			1	ja		Gemcitabin + Tarceva	2	doce	2010-08-30	0.6	0.6	2010-09-02	0.7	0.7	40420	40423	3			0	40423	0	#NUM!			0	0	0	0			0	0	0	0			0	0
P85	0	1	9.97	6.03	1	f	0	0	3	1			1	ja		Gemcitabin	3	doce	2011-02-15	1	1	2011-02-18	1	1	40589	40592	3	2011-03-01	0.75	0.75	40592	40603	11	2011-03-22	0.75	0.75	40624	40639	21	2011-04-06	0.75	0.75	40639	40653	15	2011-04-20	0.75	0.75	40653
P86	1	1	3.8	3.1	1	m	0	0	3	1			1	nein	123456		0	nein	2012-03-14	1	1	2012-03-30	1	1	40982	40998	16	2012-04-17	1	1	40998	41016	18	2012-05-02	1	1	41031	41044	15	2012-05-15	0.85	0.85	41044	41065	13	2012-06-05	0.85	0.85	41065
P87	0	1	3.97	2.2	1	m	0	0	3	1			1	ja		Taxotere	4	nein	2012-01-20	1	1	2012-02-13	1	1	40928	40952	24	2012-02-28	1	1	40952	40967	15			0	0	0	#NUM!			0	0	0	0			0	0
P88	1	0.7	3.2	3.2	1	m	1	1	1	0	1	1	3	ja		FOLFIRINOX	1	nein	2013-10-16	0.7	0.7	2013-11-15	0.7	0.7	41563	41593	30	Tod		0	41593	Tod	#VALUE!			0	0	0	#VALUE!			0	0	0	0			0	0
P89	0	0.9	6.73	5.73	1	m		0	3	1			1	ja		irino/xeloda		nein	2012-12-25	0.9	0.9	2012-11-08	0.9	0.9	41268	41221	#NUM!	2012-11-20	0.85	0.85	41221	41233	12	2012-12-16	0.85	0.85	41259	41264	26	2012-12-21	0.85	0.85	41264	40912	5	2012-01-04	0.85	0.85	40912
P90	0	1	11.37	8.9	1	m	0	0	3	1			1	ja		Gemcitabin + Abraxane	2	nein	2014-10-21	1	1	2014-11-04	1	1	41933	41947	14	2014-11-18	1	1	41947	41961	14	2014-12-02	1	1	41975	41989	14	2014-12-16	1	1	41989	42003	14	2014-12-30	1	1	42003
P91	0	1	22.53	9.4	1	m	1	1	1	0	0	0	1	ja		Gemcitabin + Abraxane	2	myocet	2013-04-08	1	1	2013-04-23	1	1	41372	41387	15	2013-05-08	1	1	41387	41402	15	2013-05-22	1	1	41416	41430	14	2013-06-05	1	1	41430	41444	14	2013-06-19	1	1	41444
P92	0	1	5.47	5.47	1	f	0	0	3	1			1	ja		Gemcitabin + Abraxane	2	nein	2013-08-27	1	1	2013-09-10	1	1	41513	41527	14	2013-10-09	0.85	0.85	41527	41556	29	2013-10-29	0.85	0.85	41576	41611	20	2013-12-03	0.85	0.85	41611	41613	35	2013-12-05	0.85	0.85	41613
P93	1	1	17.37	17.37	0	f	0	0	3	1			1	nein	123456		0	not yet	2015-05-13	1	1	2015-05-28	1	1	42137	42152	15	2015-06-11	1	1	42152	42166	14	2015-07-03	1	1	42188	42202	22	2015-07-17	1	1	42202	42216	14	2015-07-31	1	1	42216
P94	1	1	2.6	2.6	1	f	1	1	2	0	1	0	1	nein	123456		0	nein	2013-04-05	1	1	2013-05-27	0.85	0.85	41369	41421	52			0	41421	0	#NUM!			0	0	0	0			0	0	0	0			0	0
P95	1	0.75	8.3	5.7	1	m	0	0	3	1			1	ja		Taxotere	4	nein	2012-09-25	0.75	0.75	2012-10-09	0.75	0.75	41177	41191	14	2012-10-23	0.75	0.75	41191	41205	14	2012-11-08	0.75	0.75	41221	41235	16	2012-11-22	0.75	0.75	41235	41249	14	2012-12-06	0.75	0.75	41249
P96	0	0.85	4.7	4.7	1	f	0	0	3	1			1	nein	123456	nein	0	nein	2013-08-28	0.85	0.85	2013-09-11	0.85	0.85	41514	41528	14	2013-09-25	0.85	0.85	41528	41542	14	2013-10-10	0.85	0.85	41557	0	15			0	0	0	#NUM!			0	0
P97	0	1	33.6	23.53	1	m	0	0	3	1			1	ja		Gemcitabin + Abraxane	2	nein	2012-05-09	1	1	2012-05-23	1	1	41038	41052	14	2012-06-06	1	1	41052	41066	14	2012-06-20	1	1	41080	41094	14	2012-07-04	1	1	41094	41108	14	2012-07-18	1	1	41108
P98	1	0.85	5.37	1.83	1	m	0	0	3	1			1	ja		Gemcitabin + Abraxane	2	nein	2013-07-22	0.85	0.85	2013-08-20	0.85	0.85	41477	41506	29	2013-09-05	0.85	0.85	41506	41522	16	2013-10-13	0.85	0.85	41560	0	38			0	0	0	#NUM!			0	0
P99	1	1	37.73	20.43	1	m	1	1	2	0	1	1	3	ja		FOLFIRINOX	1	gem-nab	2013-09-09	1	1	2013-09-23	1	1	41526	41540	14	2013-10-08	1	1	41540	41555	15	2013-10-22	1	1	41569	41583	14	2013-11-05	0.8	0.8	41583	41597	14	2013-11-19	0.8	0.8	41597
P100	0	1	16.93	12.4	1	m	0	0	3	1			1	nein			0	nein	2015-05-26	1	1	2015-06-10	1	1	42150	42165	15	2015-06-25	1	1	42165	42180	15	2015-07-09	1	1	42194	42208	14	2015-07-23	1	1	42208	42222	14	2015-08-06	1	1	42222
P101	0	70% FU 80%	10.43	1.87	1	m	0	0	3	1			1	ja		Gemcitabin + Abraxane	2	myocet	2015-12-07	70% FU 80%	0.73	2015-12-21	70% FU 80%	0.73	42345	42359	14	2015-01-05	70% FU 80%	0.73	42359	42009	#NUM!	2015-01-19	70% FU 80%	0.73	42023	0	14			0	0	0	#NUM!			0	0
P102	1	1	28.8	10.43	1	f	0	0	3	1			1	ja		Gemcitabin + Abraxane	2	myocet	2014-06-06	1	1	2014-06-20	1	1	41796	41810	14	2014-07-04	1	1	41810	41824	14	2014-07-18	1	1	41838	41855	14	2014-08-04	1	1	41855	41870	17	2014-08-19	0.7	0.7	41870
P103	0	1	13.3	5.57	1	f	0	0	3	1			1	ja		Gemcitabin + Tarceva	2	tax	2010-09-29	1	1	2010-10-14	1	1	40450	40465	15	2010-11-05	1	1	40465	40487	22	2010-12-02	1	1	40514	40540	27	2010-12-28	1	1	40540	40190	26	2010-01-12	1	1	40190
P104	1	1	7.47	7.47	1	f	0	0	3	1			1	nein	123456			nein	2015-10-22	1	1	2015-11-17	1	1	42299	42325	26	2015-12-01	1	1	42325	42339	14	2015-01-05	1	1	42009	42145	#NUM!	2015-05-21	1	1	42145	42039	136	2015-02-04	0.8	0.8	42039
P105	1	1	0.97	0.97	1	m	0	0	3	1			1	ja		Gemcitabin	3	nein	2010-10-06	1	1			0	40457	0	#NUM!			0	0	0	0			0	0	0	0			0	0	0	0			0	0
P106	0	1	9.97	2.37	1	f	0	0	3	1			1	ja		Gemcitabin + Abraxane	2	not yet	2015-12-21	1	1	2015-01-11	1	1	42359	42015	#NUM!	2015-02-02	0.75	0.75	42015	42037	22	2015-02-16	0.75	0.75	42051	0	14			0	0	0	#NUM!			0	0
P107	0	0.8	13.93	10.87	1	m	0	0	3	1			1	ja		Gemcitabin + Abraxane	2	not yet	2015-08-24	0.8	0.8	2015-09-08	0.8	0.8	42240	42255	15	2015-09-22	0.8	0.8	42255	42269	14	2015-10-13	0.8	0.8	42290	42304	21	2015-10-27	0.8	0.8	42304	42318	14	2015-11-10	0.8	0.8	42318
P108	0	1	10.97	9.1	1	m	1	1	2	0	1	1	3	ja		FOLFIRINOX	1	nein	2012-02-02	1	1	2012-02-17	1	1	40941	40956	15	2015-03-02	1	1	40956	42065	1109	2015-03-19	1	1	42082	42096	17	2015-04-02	1	1	42096	42111	14	2015-04-17	1	1	42111
P109	0	0.75	12.33	5.67	1	f	0	0	3	1			1	ja		Gemcitabin + Abraxane	2	Gem+erlot	2014-09-12	0.75	0.75	2014-10-03	0.75	0.75	41894	41915	21	2014-10-17	0.75	0.75	41915	41929	14	2014-10-31	0.75	0.75	41943	41956	14	2014-11-13	0.75	0.75	41956	41970	13	2014-11-27	0.75	0.75	41970
P110	0	1	29.37	22.57	1	m	0	0	3	1			1	ja		Folfirinox (reinduktion)		nein	2011-06-24	1	1	2011-07-08	1	1	40718	40732	14	2011-07-22	1	1	40732	40746	14	2011-08-05	1	1	40760	40774	14	2011-08-19	1	1	40774	40788	14	2011-09-02	1	1	40788
P111	1	1	21.87	11.63	1	f	0	0	3	1			1	ja		Gemcitabin + Abraxane	2	Myocet	2014-03-17	1	1	2014-04-04	1	1	41715	41733	18	2014-05-06	1	1	41733	41765	32	2014-05-20	1	1	41779	41793	14	2014-06-03	1	1	41793	40711	14	2011-06-17	1	1	40711
P112	0	1	20.97	1.37	1	f	0	0	3	1			1	ja		Gemcitabin + Tarceva	2	Doce	2012-10-05	1	1	2012-10-19	1	1	41187	41201	14	2012-10-31	1	1	41201	41213	12	2012-11-15	1	1	41228	0	15			0	0	0	#NUM!			0	0
P113	0	0.75	4.13	4.13	1	f	0	0	3	1			1	nein	123456	nein		nein	2011-09-29	0.75	0.75	2011-10-17	0.75	0.75	40815	40833	18	2011-10-31	0.75	0.75	40833	40847	14	2011-11-14	0.75	0.75	40861	40876	14	2011-11-29	0.75	0.75	40876	40904	15	2011-12-27	0.75	0.75	40904
P114	0	1	3.3	3.3	1	f	0	0	3	1			1	nein	123456		0	nein	2012-10-03	1	1	2012-10-18	1	1	41185	41200	15	2012-11-09	1	1	41200	41222	22			0	0	0	#NUM!			0	0	0	0			0	0
P115	0	0.75	40.43	40.43	0	f	0	0	3	1			1	ja		Gemcitabin	3	nein	2013-06-20	0.75	0.75	2013-07-04	0.75	0.75	41445	41459	14	2013-07-18	0.75	0.75	41459	41473	14	2013-08-09	0.75	0.75	41495	41516	22	2013-08-30	0.75	0.75	41516	41537	21	2013-09-20	0.75	0.75	41537
P116	1	1	27.8	19.7	1	m	0	0	3	1			1	ja		gem-nab	0	napoli	2014-07-04	1	1	2014-07-18	100%, IRI 85%	0.9	41824	41838	14	2014-08-01	100%, IRI 85%	0.9	41838	41852	14	2014-08-18	100%, IRI 85%	0.9	41869	41884	17	2014-09-02	100%, IRI 85%	0.9	41884	41906	15	2014-09-24	100%, IRI 85%	0.9	41906
P117	0	0.75	34.5	5.37	1	m	0	0	3	1			1	ja		Gemcitabin	3	doce	2011-02-04	0.75	0.75	2011-02-21	0.75	0.75	40578	40595	17	2011-03-07	0.75	0.75	40595	40609	14	2011-03-24	0.75	0.75	40626	40648	17	2011-04-15	0.5	0.5	40648	40665	22	2011-05-02	0.5	0.5	40665
P118	1	1	73.67	3.67	1	m	0	0	3	1			1	ja		Gemcitabin + Tarceva	2	nein	2010-09-27	1	1	2010-10-11	1	1	40448	40462	14	2010-10-25	100%Iri75%	0.92	40462	40476	14	2010-11-08	100%Iri75%	0.92	40490	40511	14	2010-11-29	100%Iri75%	0.92	40511	40525	21	2010-12-13	100%Iri75%	0.92	40525
P119	0	1	18.8	3.27	1	m	0	0	3	1			1	ja		Gemcitabin + Tarceva	2	gem-nab	2012-08-09	1	1	2012-08-27	1	1	41130	41148	18	2012-09-10	1	1	41148	41162	14	2012-09-24	1	1	41176	41190	14	2012-10-08	1	1	41190	41204	14	2012-10-22	1	1	41204
P120	0	1	16.63	9.9	1	f	0	0	3	1			1	ja		Gemcitabin + Abraxane	2	myocet	2014-12-22	1	1	2014-01-07	1	1	41995	41646	#NUM!	2014-01-21	1	1	41646	41660	14	2014-01-28	1	1	41667	41681	7	2014-02-11	1	1	41681	41695	14	2014-02-25	1	1	41695
P121	1	1	12.37	2.7	1	m	0	0	3	1			1	ja		Taxotere		gem-erlot	2012-06-18	1	1	2012-07-03	1	1	41078	41093	15	2012-07-17	100% oxali85%	0.95	41093	41107	14	2012-07-31	100% oxali85%	0.95	41121	41138	14	2012-08-17	100% oxali85%	0.95	41138	41158	17	2012-09-06	100% oxali85%	0.95	41158
P122	0	1	8.37	5.13	1	m	0	0	3	1			1	nein	123456		0	nein	2014-06-30	1	1	2014-07-15	1	1	41820	41835	15	2014-08-11	1	1	41835	41862	27	2014-09-04	1	1	41886	41918	24	2014-10-06	1	1	41918	41939	32	2014-10-27	1	1	41939
P123	1	1	22.67	22.67	0	m	0	0	3	1			1	ja		Gemcitabin + Abraxane	2	not yet	2014-12-05	1	1	2014-12-19	1	1	41978	41992	14	2014-01-09	1	1	41992	41648	#NUM!	2014-01-23	1	1	41662	41681	14	2014-02-11	1	1	41681	41695	19	2014-02-25	1	1	41695
[truncated: 57 more columns]
